# Supplementary material for: Clinical trials of homeopathy in urological disorders: a systematic review
Source: publisher site journal article supplement (doi:10.1515/jcim-2020-0068), 2020-07-14
Supplement: Supplementary file 1 [file j_jcim-2020-0068_suppl_001.docx]

ANNEXURE - I

Table 1: Classification criteria for levels of evidence

| Levels of evidence | Criteria |
| --- | --- |
| A (Strong Scientific Evidence) | Statistically significant evidence of benefit from >2 properly randomized trials (RCTs), OR evidence from one properly conducted RCT AND one properly conducted meta-analysis. |
| B (Good Scientific Evidence) | Statistically significant evidence of benefit from 1-2 properly randomized trials, OR evidence of benefit from >1 properly conducted meta-analysis OR evidence of benefit from >1 cohort/case-control/non-randomized trials. |
| C (Unclear or conflicting scientific evidence) | Evidence of benefit from >1 small RCT(s) without adequate size, power, statistical significance, or quality of design by objective criteria, OR conflicting evidence from multiple RCTs without a clear majority of the properly conducted trials showing evidence of benefit or ineffectiveness. |
| D (Fair Negative Scientific Evidence) | Statistically significant negative evidence (i.e., lack of evidence of benefit) from cohort/case control/ non-randomized trials. |
| E (Strong Negative Scientific Evidence) | Statistically significant negative evidence (i.e. lack of evidence of benefit) from >1 properly randomized adequately powered trial(s) of high-quality design by objective criteria. |
| Lack of Evidence | Unable to evaluate efficacy due to lack of adequate available data. This is not equivalent to negative evidence. |

Table 2: Classification of clinical studies

| Level of evidence | Study design |
| --- | --- |
| 1a | Double-blind randomized clinical trials |
| 1b | Non-blinded randomized clinical trials, including those comparing homeopathy with conventional therapy as control (equivalence studies) |
| 2 | Non-randomized controlled clinical trials, including those comparing homeopathy with conventional therapy (equivalence studies) |
| 3 | Prospective observational studies, without control group |
| 4 | Retrospective studies of case-series |

Table 3: Classification of publications according to type

| Class | Publication type |
| --- | --- |
| 1a | Mainstream medicine, indexed , peer-reviewed journal |
| 1b | Complementary/alternative medicine, indexed, peer reviewed journal |
| 2 | Non-indexed journal |
| 3 | Book or book chapter, conference proceedings* |

* book chapter’ is an exclusion criterion of the current review

Table 4: Number of published papers of the authors

| Authors | No. of published papers in urology | No. of published papers in other fields |
| --- | --- | --- |
| 1. Kurz C | 1 | 0 |
| 1. Naude DF | 1 | 1 |
| 1. Hati AK | 1 | 0 |
| 1. Gupta G | 4 | 6 |
| 1. Rau MT | 1 | 0 |
| 1. Heidl R | 1 | 36 |
| 1. Malipatil CV | 1 | 0 |
| 1. Thomas B | 1 | 0 |
| 1. Siddiqui VA | 1 | 4 |
| 1. Johny J | 1 | 0 |
| 1. Oberai P | 1 | 17 |
| 1. Dhawankar NV | 1 | 0 |
| 1. Gupta N | 1 | 3 |
| 1. Patil S | 1 | 1 |

Table 5: Details of controlled trials on urological disorders

| References | Study and publication type | Aim | Population and setting | Inclusion and exclusion criteria | Design | Intervention | Control | No. of patients – attrition – ITT/PP | Key results | Funding –  conflict of interest |
| --- | --- | --- | --- | --- | --- | --- | --- | --- | --- | --- |
| Saruggia M, et al, 1992 [19] | 1a, 1b | Efficacy of China rubra 9C in intradialytic symptoms in patients with end stage renal failure | 35 patients (17 males and 18 females), Bassini Hospital, Milan, Italy | Patients with end-stage renal failure on chronic haemodialysis treatment (3 times per week), aged 18 to 76 years (mean 57.6 years) | Randomized, double-blind, placebo-controlled, cross-over study | China rubra 9C (n=?) | Placebo (n=?) | 35-?-? | Statistically significant improvements of asthenia, lethargy and headache were detected on active treatment compared to placebo. There was no significant change in nausea and vomiting. | Not stated |
| Kurz C, et al, 1993 [20] | 1a; 2 | Efficacy of Causticum D4 in irritable bladder | All age groups; Vienna | Patients of all age groups with irritable bladder symptoms | Randomized, double-blind, placebo-controlled study | Causticum D4 (n= 20) | Placebo (n= 20) | 40-0-40 (PP) | Patients treated with Causticum D improved both subjectively and objectively in comparison with placebo | Not stated |
| Naude DF, et al, 2003 [21] | 2; 3 | Efficacy of Homeopathic complex (Cantharis vesicatoris 12ch, Equisetum hyemnale 12ch, Staphisagria 12ch, Uva ursi 12ch) as well as Illex Paraguayensis 6x in nocturnal enuresis | Children; Durban | Children between the age of five and eighteen suffering from nocturnal eneuresis, living in various children homes in Durban. Exclusion criteria were not stated | Non randomized, non blinded, placebo controlled trial | Homeopathic complex (Cantharis vesicatoris 12ch, Equisetum hyemnale 12ch, Staphisagria 12ch, Uva ursi 12ch) as well as Illex Paraguayensis 6x (n=16) | Placebo (n=16) | 32-?-32 (PP) | The treatment group showed statistical significant result in comparison with placebo | Not stated |
| Hati AK, et al., 2012 [22] | 1a; 1b | Comparison of organopathic (OM),  constitutional (CM) homeopathic medicines alone, or in combination (BCOM) in the treatment of BHP | Adults; Odisha | Diagnosed cases of BHP, residing at Odisha; aged 30-90 yrs; presenting symptoms of prostatism, with or without evidence of bladder outflow obstruction. Patient with serum prostate specific  antigen (PSA) > 4 nmol/mL; malignancy, complete urinary retention or stone formation and gross bilateral hydronephrosis were excluded from the study. | Controlled trial (non-randomized and sequentially allocated) | Combination of organopathic and constitutional homeopathic medicines (BCOM) (n=77) | Organopathic medicines (OM) (73) and Constitutional medicines (CM) (70) | 220-40-180 (PP) | Homeopathic combined constitutional and organopathic treatment had a greater beneficial effect on patients with BHP than either constitutional or organopathic treatment alone, in terms of subjective parameters, residual volume, uroflowmetry, although not in terms of prostate weight, estimated by ultrasonography. | Not stated |

Table 6: Details of observational studies / non-randomised trials on urological disorder

| References | Study and publication type | | Aim | Population and setting | Inclusion and exclusion criteria | Design | Intervention | No. of patients – attrition – ITT/PP | Key results | Funding –  conflict of interest |
| --- | --- | --- | --- | --- | --- | --- | --- | --- | --- | --- |
| Gupta G; 1994 [23] | 3; 2 | | Role of individualized homeopathic medicines in prostatic hypertrophy | Adults; Lucknow | Not stated | Prospective, open, observational study | Homeopathic individualized medicine (n=100) | 100-33-66 (PP) | Homeopathic  drugs showed promising  action in each grade of prostate  hypertrophy | Not stated |
| Rau MT, 2003 [24] | 3; 2 | Role and tolerability of FOMEPIKEHL D5 drops for prostate adenomas | | Adults; Switzerland | Diagnosed cases of Prostate Adenoma; aged 30-88 yrs | Observational study | FOMEPIKEHL D5 drops (n=60) | 60-0-60 (PP) | FOMEPIKEHL D5 drops was well-tolerated and efficient therapeutic agent for prostate adenomas | Not stated |
| Gupta G, 2006 [25] | 3; 2 | Role of homeopathic medicines in benign prostatic hypertrophy | | Adults; Lucknow | Diagnosed cases of BHP | Observational study | Homeopathic individualized medicines (n= 206) | 206-0-206 (PP) | Homeopathic medicine shows marvellous response in symptom complex | Not stated |
| Gupta G, 2010 [26] | 3; 1b | Role of homeopathic medicines in BHP | | Adults; Lucknow | Age above 50 years with signs and symptoms  of BHP; PSA level equal to or below 4 ng/ml; presence of smooth firm elastic enlargement of prostate on DRE and enlarged prostate weighing more than 20 grams on USG were found eligible to participate in the study. | Prospective, open, observational study | Homeopathic individualized medicines (n=121) | 121-78-43 (PP) | 93% of the patients improved clinically with positive changes in diagnostic parameters | Not stated |
| Heidl R, 2010 [27] | 3; 2 | Role and tolerability of FOMEPIKEHL D5 drops in prostate adenoma | | Adults; Germany | Not stated | Observational study | Efficacy and tolerability of FOMEPIKEHL D5 drops (n=64) | 64-0-64 (PP) | 99.5% patients shows very good to moderate response | Not stated |
| Malipatil CV, 2010 [28] | 3; 2 | Role of Sabal serrulata mother tincture in BHP | | Adult; Bangalore, India | Patients aged ≥ 50yrs with symptoms of BHP; enlarge prostate on USG were included.  Patients with CA prostate; complete retention of urine of > 24hrs; on digital rectal examination hard, lumpy and abnormal area; UTI; neurogenic bladder; Urethral stricture; benign neoplasm except adenoma, myoma, fibroma of prostate; systemic and neurological disorder were excluded. | Prospective, open, observational study | Sabal serrulata mother tincture (n=30) | 30-0-30 (PP) | 83% patients showed marked improvement on BHP | Not stated |
| Thomas B, 2010 [29] | 3; 2 | Role of Clearstone combination in renal calculi and colic | | All age groups; India | Both sexes; all age groups; Diagnosed case of renal calculi of all varieties with sign and symptoms of renal calculi persons are included. Patient with severe hydronephrosis, severe haematuria, single kidney, renal insufficiency; under treatment of any other major chronic illness; routein use of pain killer for any other clinical condition were excluded. | Single blinded, multicentric, interventional, safety, non comparative study | Clearstone combination (Berberis vulgaris ø, Sarsaparilla ø, Ocimum can ø, Solidago ø, Pareira brava ø, Senicio aureus ø) | 60-0-60 (PP) | Clearstone was highly effective in alleviating renal colic and other symptoms of renal calculi | Not stated |
| Siddiqui VA, 2011 [30] | 3; 1b | Role of individualised homeopathic medicines in urolithiasis | | All age groups; India | Cases (symptomatic and asymptomatic) with radiological evidence (X-ray and ultrasound KUB) of calculi in kidney/ureter/ bladder and no history of expulsion of calculi after the radiological investigation within one month period were included. Cases with moderate or severe hydronephrosis, uremia, recurrent urinary tract infections (other than  calculi), acute retention of urine for more than 24 hours, hyperparathyroidism, gross developmental defects or structural abnormality of kidney, other systemic diseases like cardiovascular, endocrinal diseases or systemic infections or on other treatment therapies, kidney function impairment, stag horn calculus and calculi in poles of kidney were excluded. | Prospective, open, multicentric, observational study | Role of homeopathic medicines (n= 311) | 311-91-220 (PP) | Homeopathic medicines had marked role in urolithiasis | Study funded by CCRH; conflict of interest: not stated |
| Johny J, 2012 [31] | 3; 2 | Role of homeopathic individualized medicines in BHP | | Adults; Kerala, India | Diagnosed case of BHP, aged between 50-75yrs, purely benign cases were included. Cases with high PSA, DRE suggest CA prostate, not fulfil the diagnostic criteria were excluded. | Prospective, observational study | Homeopathic individualized medicines (n= 30) | 30-0-30 (PP) | Homeopathic medicines showed marked improvement | Not stated |
| Oberai P, 2012 [32] | 3; 1b | Role of homeopathic individualised medicine in BHP | | Adult; India | Patients with ≥ 50 years of age, having sign and  symptoms of BHP, PSA level ≤4 ng/ml, smooth, firm and elastic enlargement of prostate on digital rectal examination and PV >20ml on ultrasonic examination were included. Patients with complete retention of urine ≥ 24 hours, complications  from benign neoplasm needing hospitalization, history of prostatic carcinoma and other possible causes such as urinary tract infection, neurogenic bladder, or urethral stricture were excluded. | Prospective, multicentric, observational study | Homeopathic individualized predefined medicines (n= 231) | 231- 44-187 (PP) | Homeopathic medicines significantly improved lower urinary tract symptoms in men with BHP | Study funded by CCRH; conflict of interest: none |
| Dhawankar NV, 2013 [33] | 3; 2 | Role of individualised homeopathic medicines in renal colic | | Adults; India | Cases of renal calculi suffering from renal colic; age between 30 and 50 yrs; both sexes were included. Patients suffering from renal colic other than renal colic cause; suffering from other systemic diseases was excluded. | Open, observational study | Homeopathic individualized medicines (n=70) | 70-0-70 (PP) | Homeopathy had excellent effect on renal colic | Not stated |
| Gupta G, 2016 [34] | 3; 1b | Role of individualised homeopathic medicines with Sabal serrulata mother tincture in BHP | | Adults; Lucknow | Patient with ≥ 50gm of weight of prostate in USG were included | Open, observational, retrospective study | Homeopathic individualized medicines (n= 61) | 61-0-61(PP) | Almost 64% of patients reduced their prostatic weight significantly | Non funded study; Conflict of interest: None |
| Gupta N, 2017 [35] | 3; 2 | Clinical verification of homeopathic individualized medicines in BHP | | Adults; Delhi | Patients age ≥ 45yrs, residing around NCR with symptoms of BHP were included | Open, observational study | Homeopathic individualized medicines (n= 30) | 30-0-30 (PP) | 83% patients showed marked to moderate improvement in symptomatology and size of prostate | Not stated |
| Patil S, 2017 [36] | 3; 2 | Prophylactic role of three different prescribing strategies of Berberis vulgaris in urolithiasis | | Adults; Miraj, India | Inclusion criteria were patients aged 20 years or above, of both sexes, patients having history of recurrence at least thrice before commencement of homeopathic treatment and continued homeopathic treatment for at least last two years. Cases having any known malignancy or known immune suppression were excluded. | Prospective, open, non-randomized, three parallel arms, pragmatic, comparative trial | Berberis vulgaris (n=22) vs Berberis vulgaris and add on individualized medicines (n=17) vs individualized medicine (n= 11) | 50-0-50 (PP) | Three different prescribing strategies of B.  vulgaris did not produce any statistically different results in preventing recurrence of urolithiasis | Non funded study; Conflict of interest: None |

Table 7: Risk of bias analysis of the controlled trials by Cochrane Collaboration Tool

| References | Domain I: Random sequence generation | Domain II: Allocation concealment | Domain III: Blinding of participants and personnel | Domain IV: Blinding of outcome assessors | Domain V: Incomplete outcome data | Domain VI: Selective reporting | Domain VII: Anything else | Overall RoB |
| --- | --- | --- | --- | --- | --- | --- | --- | --- |
| Saruggia M, et al, 1992 [19] | ? | ? | ? | ? | ? | ? | ? | Unclear |
| Kurz C, et al, 1993 [20] | + | ? | ? | ? | - | - | ? | High |
| Naude DF, et al, 2003 [21] | ? | ? | ? | ? | ? | ? | ? | Unclear |
| Hati AK, et al., 2012 [22] | - | ? | - | - | ? | ? | + | High |

+: Low risk of bias; - : High risk of bias; ? : Unclear risk of bias

Table 8: Model validity assessment of the controlled trials by Mathie’s criteria

| References | Domain I: Rationale for the choice of the particular homeopathic intervention | Domain II: Homeopathic principles reflected in the intervention | Domain III: Extent of homeopathic practitioner input | Domain IV: Nature of the main outcome measure | Domain V: Capability of the main outcome measure to detect change | Domain VI: Length of the follow-up to the endpoint of the study | Overall validity | Validity rating |
| --- | --- | --- | --- | --- | --- | --- | --- | --- |
| Saruggia M, et al, 1992 [19] | Y | U | U | Y | Y | Y | Unclear | B2 |
| Kurz C, et al, 1993 [20] | U | U | U | Y | Y | Y | Unclear | B3 |
| Naude DF, et al, 2003 [21] | U | N | U | Y | Y | Y | Inadequate | C1.2 |
| Hati AK, et al., 2012 [22] | Y | Y | Y | Y | Y | Y | Adequate | A |

Y: Yes; N: No; U: Uncertain

Table 9: Quality of individualization assessment of the controlled trials by Saha’s criteria

| References | Criterion I: Single medicine prescription when required on each occasion | Criterion II: Medicine individualisation | Criterion III: Proper description of approach to medicine individualisation | Criterion IV: Dose individualisation | Criterion V: Proper description of approach to dose individualisation | Criterion VI: Subsequent prescriptions as per Kent’s observations and/or Hering’s law | Score (max. 6) |
| --- | --- | --- | --- | --- | --- | --- | --- |
| Saruggia M, et al, 1992 [19] | Y | U | U | N | N | N | 1 |
| Kurz C, et al, 1993 [20] | Y | N | N | U | U | U | 1 |
| Naude DF, et al, 2003 [21] | N | N | N | N | N | N | 0 |
| Hati AK, et al., 2012 [22] | Y | Y | Y | Y | U | U | 4 |

Y: Yes; N: No; U: Uncertain

Table 10: Methodological quality analysis of the observational studies and non-comparative, non-randomised trials by MINORS criteria

| References | Aim stated clearly | Consecutive patients inclusion | Prospective data collection | Appropriate endpoint to study aim | Unbiased assessment of study endpoints | Follow-up period appropriate to the aim | Loss to follow up < 5% | Prospective calculation of study size | Total score |
| --- | --- | --- | --- | --- | --- | --- | --- | --- | --- |
| Gupta G, 1994 [23] | 0 | 1 | 1 | 2 | 1 | 1 | 1 | 0 | 7 |
| Rau MT, 2003 [24] | 2 | 2 | 2 | 1 | 1 | 2 | 0 | 0 | 10 |
| Gupta G, 2006 [25] | 2 | 2 | 2 | 2 | 1 | 2 | 1 | 0 | 12 |
| Gupta G, 2010 [26] | 2 | 2 | 2 | 2 | 1 | 2 | 2 | 0 | 13 |
| Heidl R, 2010 [27] | 2 | 2 | 2 | 1 | 1 | 1 | 0 | 0 | 9 |
| Malipatil CV, 2010 [28] | 2 | 1 | 2 | 1 | 1 | 1 | 1 | 0 | 9 |
| Thomas B, 2010 [29] | 2 | 1 | 2 | 1 | 1 | 1 | 1 | 0 | 9 |
| Siddiqui VA, 2011 [30] | 2 | 2 | 2 | 2 | 2 | 2 | 2 | 0 | 14 |
| Johny J, 2012 [31] | 2 | 2 | 2 | 1 | 1 | 0 | 0 | 0 | 8 |
| Oberai P, 2012 [32] | 1 | 2 | 2 | 2 | 1 | 2 | 2 | 0 | 12 |
| Dhawankar NV, 2013 [33] | 2 | 1 | 2 | 1 | 1 | 1 | 0 | 0 | 8 |
| Gupta G, 2016 [34] | 2 | 2 | 0 | 2 | 1 | 2 | 2 | 0 | 11 |
| Gupta N, 2017 [35] | 1 | 2 | 2 | 2 | 1 | 1 | 2 | 0 | 11 |

0: Not reported; 1: Reported but inadequate; 2: Reported and adequate

Table 11: Methodological quality analysis of the comparative, non-randomised trials by MINOR’s criteria

| References | Aim stated clearly | Consecutive patients inclusion | Prospective data collection | Appropriate endpoint to study aim | Unbiased assessment of study endpoints | Follow-up period appropriate to the aim | Loss to follow up < 5% | Prospective calculation of study size | An adequate control group | Contemporary groups | Baseline equivalence of groups | Adequate statistical analyses | Total score |
| --- | --- | --- | --- | --- | --- | --- | --- | --- | --- | --- | --- | --- | --- |
| Patil S, 2017 [36] | 2 | 2 | 2 | 2 | 1 | 2 | 2 | 0 | 0 | 2 | 0 | 1 | 16 |

0: Not reported; 1: Reported but inadequate; 2: Reported and adequate

Table 12: Assessment of quality of individualization of the observational studies and non-randomized trials by Saha’s criteria

| References | Criterion I: Single medicine prescription when required on each occasion | Criterion II: Medicine individualisation | Criterion III: Proper description of approach to medicine individualisation | Criterion IV: Dose individualisation | Criterion V: Proper description of approach to dose individualisation | Criterion VI: Subsequent prescriptions as per Kent’s observations and/or Hering’s law | Score |
| --- | --- | --- | --- | --- | --- | --- | --- |
| Gupta G, 1994 [23] | U | Y | Y | U | N | U | 2 |
| Rau MT, 2003 [24] | N | N | U | N | N | U | 0 |
| Gupta G, 2006 [25] | Y | Y | Y | Y | Y | Y | 6 |
| Gupta G, 2010 [26] | Y | Y | Y | Y | Y | Y | 6 |
| Heidl R, 2010 [27] | U | N | Y | U | U | U | 1 |
| Malipatil CV, 2010 [28] | Y | Y | Y | N | N | U | 3 |
| Thomas B, 2010 [29] | U | N | N | N | N | U | 0 |
| Siddiqui VA, 2011 [30] | Y | Y | Y | Y | Y | Y | 6 |
| Johny J, 2012 [31] | Y | Y | Y | Y | Y | U | 5 |
| Oberai P, 2012 [32] | Y | Y | Y | Y | Y | Y | 6 |
| Dhawankar NV, 2013 [33] | Y | Y | Y | N | N | U | 3 |
| Gupta G, 2016 [34] | Y | Y | Y | Y | Y | Y | 6 |
| Gupta N, 2017 [35] | Y | Y | Y | Y | Y | Y | 6 |
| Patil S, 2017 [36] | Y | Y | Y | Y | Y | Y | 6 |

Y: Yes; N: No; U: Uncertain
